# Supplementary material for: Using Network-Based Machine Learning to Predict Transcription Factors Involved in Drought Resistance
Source: Front Genet. 2021 Jun 24;12:652189. doi: 10.3389/fgene.2021.652189 (PMC8264776; doi:10.3389/fgene.2021.652189)
Supplement: Supplementary Data 9 — GEO datasets used to build GRAiN. [file Data_Sheet_9.XLSX]

## Sheet: Sheet1
Supplementary Data S9: Datasets used to build the GRN.
Sample	GEO	Tissue	Context	Stage	Group	Notes
0h_aerobic	E-MEXP-2267	whole plant	normal	seedling	Amaroo
12h_aerobic	E-MEXP-2267	whole plant	normal	seedling	Amaroo
12h_anaerobic	E-MEXP-2267	whole plant	nutrient	seedling	Amaroo
1h_aerobic	E-MEXP-2267	whole plant	normal	seedling	Amaroo
1h_anaerobic	E-MEXP-2267	whole plant	flooding	seedling	Amaroo
24h_aerobic	E-MEXP-2267	whole plant	normal	seedling	Amaroo
24h_aerobic_to_3h_anaerobic_switch	E-MEXP-2267	whole plant	nutrient	seedling	Amaroo
24h_aerobic_to_6h_anaerobic_switch	E-MEXP-2267	whole plant	nutrient	seedling	Amaroo
24h_anaerobic	E-MEXP-2267	whole plant	nutrient	seedling	Amaroo
24h_anaerobic_to_3h_aerobic_switch	E-MEXP-2267	whole plant	nutrient	seedling	Amaroo
24h_anaerobic_to_6h_aerobic_switch	E-MEXP-2267	whole plant	nutrient	seedling	Amaroo
27h_aerobic	E-MEXP-2267	whole plant	normal	seedling	Amaroo
27h_anaerobic	E-MEXP-2267	whole plant	nutrient	seedling	Amaroo
30h_aerobic	E-MEXP-2267	whole plant	normal	seedling	Amaroo
30h_anaerobic	E-MEXP-2267	whole plant	normal	seedling	Amaroo
30h_anerobic	E-MEXP-2267	whole plant	nutrient	seedling	Amaroo
3h_aerobic	E-MEXP-2267	whole plant	normal	seedling	Amaroo
3h_anaerobic	E-MEXP-2267	whole plant	nutrient	seedling	Amaroo
OsSKIPa_Overexpression	GSE10054	whole plant	normal	seedling	Japonica
OsSKIPa_Suppression	GSE10054	whole plant	normal	seedling	Japonica
Rice_mutant_dst	GSE11175	whole plant	normal	seedling	Japonica
Rice_Zhonghua11	GSE11175	whole plant	normal	seedling	Japonica
14.day.old_seedling_control	GSE14275	whole plant	normal	seedling	Japonica
Heat_shock	GSE14275	whole plant	heat	seedling	Japonica
FL478_root_control	GSE14403	root	normal	Vegetative	FL478
FL478_root_salt.treated	GSE14403	root	salt	Vegetative	IR29
IR29_root_control	GSE14403	root	normal	Vegetative	IR29
IR29_root_salt.treated	GSE14403	root	salt	Vegetative	IR29
IR3731_root_salt.treated	GSE14403	root	salt	Vegetative	IR63731
IR63731_root_control	GSE14403	root	normal	Vegetative	IR63731
Pokkali_root_control	GSE14403	root	normal	Vegetative	Pokkali
Pokkali_root_salt.treated	GSE14403	root	salt	Vegetative	Pokkali
codA.expressing_Line22	GSE15448	shoot	drought	seedling	indica
codA.expressing_Line4	GSE15448	shoot	drought	seedling	indica
Bulk_sensitive_control	GSE16108	whole plant	normal	seedling	indica
Bulk_sensitive_stressed	GSE16108	whole plant	salt	seedling	indica
Bulk_tolerant_control	GSE16108	whole plant	normal	seedling	indica
Bulk_tolerant_stressed	GSE16108	whole plant	salt	seedling	indica
CSR27_control	GSE16108	whole plant	normal	seedling	indica
CSR27_stressed	GSE16108	whole plant	salt	seedling	indica
MI48_control	GSE16108	whole plant	normal	seedling	indica
MI48_stressed	GSE16108	whole plant	salt	seedling	indica
Fe.	GSE17245	root	nutrient	seedling	Nipponbare
P.	GSE17245	root	nutrient	seedling	Nipponbare
P..1	GSE17245	shoot	nutrient	seedling	Nipponbare
P.Fe.	GSE17245	shoot	nutrient	seedling	Nipponbare
M202_day_0	GSE18930	whole plant	normal	seedling	M202
M202_day_1	GSE18930	whole plant	flooding	seedling	M203
M202.Sub1._day_0	GSE18930	whole plant	normal	seedling	M204
M202.Sub1._day_1	GSE18930	whole plant	flooding	seedling	M205
Salt.sensitive.control	GSE21651	leaf	normal	seedling	VSR156
Salt.sensitive.stressed	GSE21651	leaf	salt	seedling	VSR156
Salt.tolerant.control	GSE21651	leaf	normal	seedling	CSR11
Salt.tolerant_stressed	GSE21651	leaf	salt	seedling	CSR11
Salt.tolerant.stressed	GSE21651	leaf	salt	seedling	CSR11
Sens.drought.control	GSE21651	leaf	normal	seedling	Vandana
Sens.drought_str	GSE21651	leaf	drought	seedling	Vandana
Tolerant.drought.control	GSE21651	leaf	normal	seedling	IR64
Tolerant.drought_str	GSE21651	leaf	drought	seedling	IR64
Control_Azucena_leaf	GSE24048	leaf	normal	Vegetative	Azucena
Control_Bala_leaf	GSE24048	leaf	normal	Vegetative	Bala
Droughted_Azucena_leaf	GSE24048	leaf	drought	Vegetative	Azucena
Droughted_Bala_leaf	GSE24048	leaf	drought	Vegetative	Bala
Rice_IRAT109_D0	GSE25176	leaf	normal	Reproductive	IRAT109
Rice_IRAT109_D1	GSE25176	leaf	drought	Reproductive	IRAT109
Rice_IRAT109_D2	GSE25176	leaf	drought	Reproductive	IRAT110
Rice_IRAT109_D3	GSE25176	leaf	drought	Reproductive	IRAT111
Rice_ZS97_D0	GSE25176	leaf	normal	Reproductive	ZS97
Rice_ZS97_D1	GSE25176	leaf	drought	Reproductive	ZS98
Rice_ZS97_D2	GSE25176	leaf	drought	Reproductive	ZS99
Rice_ZS97_D3	GSE25176	leaf	drought	Reproductive	ZS100
Control_rice_root	GSE25206	root	normal	seedling	IR64
Rice_root_treated_with_100_µM_of_AsV	GSE25206	root	metal	seedling	IR64
Rice_root_treated_with_100_µM_of_Cd	GSE25206	root	metal	seedling	IR64
Rice_root_treated_with_100_µM_of_Cr_.VI.	GSE25206	root	metal	seedling	IR64
Rice_root_treated_with_100_µM_of_Pb	GSE25206	root	metal	seedling	IR64
Drought_treated_leaves_booting_stage	GSE26280	leaf	drought	Reproductive	IR64
Drought_treated_leaves_panicle_elongation_stage	GSE26280	leaf	drought	Reproductive	IR64
Drought_treated_leaves_tillering_stage	GSE26280	leaf	drought	Vegetative	IR64
Drought_treated_roots_panicle_elongation_stage	GSE26280	root	drought	Reproductive	IR64
Drought_treated_roots_tillering_stage	GSE26280	root	drought	Vegetative	IR64
Drought_treated_young_panicle_booting_stage	GSE26280	panicle	drought	Reproductive	IR64
normal_leaves_booting_stage	GSE26280	leaf	normal	Reproductive	IR64
normal_leaves_panicle_elongation_stage	GSE26280	leaf	normal	Reproductive	IR64
normal_leaves_tillering_stage	GSE26280	leaf	normal	Vegetative	IR64
normal_roots_panicle_elongation_stage	GSE26280	root	normal	Reproductive	IR64
normal_roots_tillering_stage	GSE26280	root	normal	Vegetative	IR64
normal_young_panicle_booting_stage	GSE26280	panicle	normal	Reproductive	IR64
rice_seedling_exposed_to_Pi.deficient_solution_for_24_hours	GSE35984	whole plant	nutrient	seedling	Zhonghua 10
rice_seedling_exposed_to_Pi.deficient_solution_for_48_hours	GSE35984	whole plant	nutrient	seedling	Zhonghua 10
rice_seedling_exposed_to_Pi.deficient_solution_for_6_hours	GSE35984	whole plant	nutrient	seedling	Zhonghua 10
rice_seedling_exposed_to_Pi.deficient_solution_for_72_hours	GSE35984	whole plant	nutrient	seedling	Zhonghua 10
rice_seedling_grown_under_Pi.sufficient_condition	GSE35984	whole plant	normal	seedling	Zhonghua 10
Rice_seedlings._ABA_treatment	GSE37557	whole plant	hormone	seedling	IR64
Rice_seedlings._ACC_treatment	GSE37557	whole plant	hormone	seedling	IR64
Rice_seedlings._BAP_treatment	GSE37557	whole plant	hormone	seedling	IR64
Rice_seedlings._control1	GSE37557	whole plant	normal	seedling	IR64
Rice_seedlings._control2	GSE37557	whole plant	normal	seedling	IR64
Rice_seedlings._IAA_treatment	GSE37557	whole plant	hormone	seedling	IR64
Rice_seedlings._JA_treatment	GSE37557	whole plant	hormone	seedling	IR64
Rice_seedlings._SA_treatment	GSE37557	whole plant	hormone	seedling	IR64
Oryza_Sativa_Japonica_C418_cold_stress_12h	GSE37940	shoot	cold	seedling	C418
Oryza_Sativa_Japonica_C418_cold_stress_24h	GSE37940	shoot	cold	seedling	C418
Oryza_Sativa_Japonica_C418_cold_stress_2h	GSE37940	shoot	cold	seedling	C418
Oryza_Sativa_Japonica_C418_cold_stress_48h	GSE37940	shoot	cold	seedling	C418
Oryza_Sativa_Japonica_C418_cold_stress_6h	GSE37940	shoot	cold	seedling	C418
Oryza_Sativa_Japonica_C418_control	GSE37940	shoot	normal	seedling	C418
Oryza_Sativa_Japonica_K354_cold_stress_12h	GSE37940	shoot	cold	seedling	K354
Oryza_Sativa_Japonica_K354_cold_stress_24h	GSE37940	shoot	cold	seedling	K354
Oryza_Sativa_Japonica_K354_cold_stress_2h	GSE37940	shoot	cold	seedling	K354
Oryza_Sativa_Japonica_K354_cold_stress_48h	GSE37940	shoot	cold	seedling	K354
Oryza_Sativa_Japonica_K354_cold_stress_6h	GSE37940	shoot	cold	seedling	K354
Oryza_Sativa_Japonica_K354_control	GSE37940	shoot	normal	seedling	K354
Rice.IR29.cold.24h	GSE38023	leaf	cold	seedling	IR29
Rice.IR29.cold.2h	GSE38023	leaf	cold	seedling	IR29
Rice.IR29.cold.48h	GSE38023	leaf	cold	seedling	IR29
Rice.IR29.cold.8h	GSE38023	leaf	cold	seedling	IR29
Rice.IR29.control	GSE38023	leaf	normal	seedling	IR29
Rice.IR29.recovery.24h	GSE38023	leaf	cold	seedling	IR29
Rice.Li.Jiang.Xin.Tuan.Hei.Gu.cold.24h	GSE38023	leaf	cold	seedling	IR29
Rice.Li.Jiang.Xin.Tuan.Hei.Gu.cold.2h	GSE38023	leaf	cold	seedling	IR29
Rice.Li.Jiang.Xin.Tuan.Hei.Gu.cold.48h	GSE38023	leaf	cold	seedling	IR29
Rice.Li.Jiang.Xin.Tuan.Hei.Gu.cold.8h	GSE38023	leaf	cold	seedling	LTH
Rice.Li.Jiang.Xin.Tuan.Hei.Gu.control	GSE38023	leaf	normal	seedling	LTH
Rice.Li.Jiang.Xin.Tuan.Hei.Gu.recovery.24h	GSE38023	leaf	cold	seedling	LTH
X3_h_stress_Dagad_deshi_7.day.old_seedling	GSE41647	whole plant	drought	seedling	Dagad_deshi
X3_h_stress_IR20_7.day.old_seedling	GSE41647	whole plant	drought	seedling	IR20
X6_h_stress_Dagad_deshi_7.day.old_seedling	GSE41647	whole plant	drought	seedling	Dagad_deshi
X6_h_stress_IR20_7.day.old_seedling	GSE41647	whole plant	drought	seedling	IR20
Control_Dagad_deshi_7.day_old.seedling	GSE41647	whole plant	normal	seedling	Dagad_deshi
Control_Dagad_deshi_7.day.old_seedling	GSE41647	whole plant	normal	seedling	IR20
Control_IR20_7.day.old_seedling	GSE41647	whole plant	normal	seedling	IR20
seedling_after_potassium_resupply.	GSE44250	whole plant	nutrient	seedling	IR64
seedling_0_hr	GSE44250	whole plant	normal	seedling	IR64
seedling_in_potassium_deficient_medium.	GSE44250	whole plant	nutrient	seedling	IR64
seedling_in_potassium_sufficient_medium.	GSE44250	whole plant	normal	seedling	IR64
Azucena_0ppm_Arsenate	GSE4471	root	normal	seedling	Azucena
Azucena_1ppm_Arsenate	GSE4471	root	salt	seedling	Azucena
Bala_0ppm_Arsenate	GSE4471	root	normal	seedling	Bala
Bala_1ppm_Arsenate	GSE4471	root	salt	seedling	Bala
Jijing88_control	GSE45724	shoot	normal	seedling	Jijing88
Jijing88_treatment	GSE45724	shoot	salt	seedling	Jijing88
K83_control	GSE45724	shoot	normal	seedling	K83
K83_treatment	GSE45724	shoot	salt	seedling	K83
HY_14.day_old_seeding.	GSE48069	whole plant	normal	seedling	HY
jmj705_mutant_14.day_old_seeding.	GSE48069	whole plant	normal	seedling	HY
JMJ705_overexpression_14.day_old_seeding.	GSE48069	whole plant	normal	seedling	ZH11
ZH11_14.day_old_seeding.	GSE48069	whole plant	normal	seedling	ZH11
Root_AlaAT.ox_1.7_0.5_mM_N	GSE48549	root	nutrient	seedling	Nipponbare
Root_AlaAT.ox_1.7_2_mM_N	GSE48549	root	nutrient	seedling	Nipponbare
Root_AlaAT.ox_1.7_5_mM_N	GSE48549	root	nutrient	seedling	Nipponbare
Root_AlaAT.ox_3.8_0.5_mM_N	GSE48549	root	nutrient	seedling	Nipponbare
Root_AlaAT.ox_3.8_2_mM_N	GSE48549	root	nutrient	seedling	Nipponbare
Root_AlaAT.ox_3.8_5_mM_N	GSE48549	root	nutrient	seedling	Nipponbare
Root_Wildtype_0.5_mM_N	GSE48549	root	nutrient	seedling	Nipponbare
Root_Wildtype_2_mM_N	GSE48549	root	nutrient	seedling	Nipponbare
Root_Wildtype_5_mM_N	GSE48549	root	nutrient	seedling	Nipponbare
Shoot_AlaAT.ox_1.7_0.5_mM_N	GSE48549	shoot	nutrient	seedling	Nipponbare
Shoot_AlaAT.ox_1.7_2_mM_N	GSE48549	shoot	nutrient	seedling	Nipponbare
Shoot_AlaAT.ox_1.7_5_mM_N	GSE48549	shoot	nutrient	seedling	Nipponbare
Shoot_AlaAT.ox_3.8_0.5_mM_N	GSE48549	shoot	nutrient	seedling	Nipponbare
Shoot_AlaAT.ox_3.8_2_mM_N	GSE48549	shoot	nutrient	seedling	Nipponbare
Shoot_AlaAT.ox_3.8_5_mM_N	GSE48549	shoot	nutrient	seedling	Nipponbare
Shoot_Wildtype_0.5_mM_N	GSE48549	shoot	nutrient	seedling	Nipponbare
Shoot_Wildtype_2_mM_N	GSE48549	shoot	nutrient	seedling	Nipponbare
Shoot_Wildtype_5_mM_N	GSE48549	shoot	nutrient	seedling	Nipponbare
root_alaAT.ox_1.7	GSE48549	root	nutrient	seedling	Nipponbare
root_alaAT.ox_1.8	GSE48549	root	nutrient	seedling	Nipponbare
root_alaAT.ox_3.8	GSE48549	root	nutrient	seedling	Nipponbare
root_wildtype_NB	GSE48549	root	normal	seedling	Nipponbare	removed
shoot_alaAT.ox_1.7	GSE48549	shoot	nutrient	seedling	Nipponbare
shoot_alaAT.ox_1.8	GSE48549	shoot	nutrient	seedling	Nipponbare
shoot_alaAT.ox_3.8	GSE48549	shoot	nutrient	seedling	Nipponbare
shoot_wildtype_NB	GSE48549	shoot	nutrient	seedling	Nipponbare
control_line._empty_pANDA._osmotic_stresscondition	GSE52640	whole plant	nutrient	seedling	Nipponbare
control_line._empty_pANDA._standardculturecondition	GSE52640	whole plant	normal	seedling	Nipponbare
control_line._empty_PC5300.OE._osmotic_stresscondition	GSE52640	whole plant	nutrient	seedling	Nipponbare
control_line._empty_PC5300.OE._standardculturecondition	GSE52640	whole plant	normal	seedling	Nipponbare
OsMADS26_downregulated_line_1._osmotic_stresscondition	GSE52640	whole plant	nutrient	seedling	Nipponbare
OsMADS26_downregulated_line_1._standardculturecondition	GSE52640	whole plant	normal	seedling	Nipponbare
OsMADS26_downregulated_line_2._osmotic_stresscondition	GSE52640	whole plant	nutrient	seedling	Nipponbare
OsMADS26_downregulated_line_2._standardculturecondition	GSE52640	whole plant	normal	seedling	Nipponbare
OsMADS26_over.expressing_line_1._osmotic_stresscondition	GSE52640	whole plant	nutrient	seedling	Nipponbare
OsMADS26_over.expressing_line_1._standardculturecondition	GSE52640	whole plant	normal	seedling	Nipponbare
OsMADS26_over.expressing_line_2._osmotic_stresscondition	GSE52640	whole plant	nutrient	seedling	Nipponbare
OsMADS26_over.expressing_line_2._standardculturecondition	GSE52640	whole plant	normal	seedling	Nipponbare
BRG.12_As_.V._0µm_	GSE53564	root	normal	seedling	BRG
BRG.12_As_.V._50µm	GSE53564	root	metal	seedling	BRG
BRG.15_As_.V._0µm_	GSE53564	root	normal	seedling	BRG
BRG.15_As_.V._50µm	GSE53564	root	metal	seedling	BRG
BRG.20_As_.V._0µm_	GSE53564	root	normal	seedling	BRG
BRG.20_As_.V._50µm	GSE53564	root	metal	seedling	BRG
CN1646.2_As_.V._0µm_	GSE53564	root	normal	seedling	CN1646
CN1646.2_As_.V._50µm	GSE53564	root	metal	seedling	CN1646
CN1646.5_As_.V._0µm_	GSE53564	root	normal	seedling	CN1646
CN1646.5_As_.V._50µm	GSE53564	root	metal	seedling	CN1646
NAYANMONI_As_.V._0µm_	GSE53564	root	normal	seedling	NAYANMONI
NAYANMONI_As_.V._50µm	GSE53564	root	metal	seedling	NAYANMONI
osnox2_mutant_under_drought_stress_condition	GSE54466	leaf	drought	Vegetative	Dongjin
osnox2_mutant_under_normal_growth_condition	GSE54466	leaf	normal	Vegetative	Dongjin
WT_plants_under_drought_stress_condition	GSE54466	leaf	drought	Vegetative	Dongjin
WT_plants_under_normal_growth_condition	GSE54466	leaf	normal	Vegetative	Dongjin
Oryza_Sativa_Indica_177_control_stress_Leaf	GSE58603	leaf	normal	seedling	177-103
Oryza_Sativa_Indica_177_control_stress_Root	GSE58603	root	normal	seedling	177-103
Oryza_Sativa_Indica_177_salinity.ABA_stress_Leaf	GSE58603	leaf	salt	seedling	177-103
Oryza_Sativa_Indica_177_salinity.ABA_stress_Root	GSE58603	root	salt	seedling	177-103
Oryza_Sativa_Indica_177_salinity_stress_Leaf	GSE58603	leaf	salt	seedling	177-103
Oryza_Sativa_Indica_177_salinity_stress_Root	GSE58603	root	salt	seedling	177-103
Oryza_Sativa_Indica_IR64_control_stress_Leaf	GSE58603	leaf	normal	seedling	IR64
Oryza_Sativa_Indica_IR64_control_stress_Root	GSE58603	root	normal	seedling	IR64
Oryza_Sativa_Indica_IR64_salinity.ABA_stress_Leaf	GSE58603	leaf	salt	seedling	IR64
Oryza_Sativa_Indica_IR64_salinity.ABA_stress_Root	GSE58603	root	salt	seedling	IR64
Oryza_Sativa_Indica_IR64_salinity_stress_Leaf	GSE58603	leaf	salt	seedling	IR64
Oryza_Sativa_Indica_IR64_salinity_stress_Root	GSE58603	root	salt	seedling	IR64
Double_mutant_under_.P_condition	GSE60823	leaf	nutrient	seedling	Nipponbare	Mutant
Double_mutant_under_.P_condition.1	GSE60823	leaf	nutrient	seedling	Nipponbare	Mutant
Wildtype_Nipponbare_under_.P_condition	GSE60823	leaf	nutrient	seedling	Nipponbare
Wildtype_Nipponbare_under_.P_condition.1	GSE60823	leaf	nutrient	seedling	Nipponbare
drought_overexression	GSE64576	leaf	drought	seedling	IRAT109
drought_wild_type	GSE64576	leaf	drought	seedling	IRAT109
normal_overexpression	GSE64576	leaf	drought	seedling	IRAT109
normal_overexression	GSE64576	leaf	normal	seedling	IRAT109
normal_wild_type	GSE64576	leaf	normal	seedling	IRAT109
7.day.old_Seedling	GSE6901	whole plant	normal	seedling	IR64
Cold_stress	GSE6901	whole plant	cold	seedling	IR64
Drought_stress	GSE6901	whole plant	drought	seedling	IR64
Salt_stress	GSE6901	whole plant	salt	seedling	IR64
phr123_triple_mutant_under_.P_condition	GSE69010	leaf	nutrient	seedling	Nipponbare
phr1_mutant_under_.P_condition	GSE69010	leaf	nutrient	seedling	Nipponbare
phr3_mutant_under_.P_condition	GSE69010	leaf	nutrient	seedling	Nipponbare
Wildtype_Nipponbare_under_.P_condition	GSE69010	leaf	nutrient	seedling	Nipponbare
Coleoptiles_Aerobic	GSE6908	whole plant	flooding	seedling	Nipponbare
Coleoptiles_Anoxic	GSE6908	whole plant	normal	seedling	Nipponbare
C063.Cold.24H	GSE71680	whole plant	cold	seedling	C063
C063.Cold.6H	GSE71680	whole plant	cold	seedling	C063
C063.N	GSE71680	whole plant	normal	seedling	C063
C070.Cold.24H	GSE71680	whole plant	cold	seedling	C070
C070.Cold.6H	GSE71680	whole plant	cold	seedling	C070
C070.N	GSE71680	whole plant	normal	seedling	C070
C079.Cold.24H	GSE71680	whole plant	cold	seedling	C079
C079.Cold.6H	GSE71680	whole plant	cold	seedling	C079
C079.N	GSE71680	whole plant	normal	seedling	C079
C087.Cold.24H	GSE71680	whole plant	cold	seedling	C087
C087.Cold.6H	GSE71680	whole plant	cold	seedling	C087
C087.N	GSE71680	whole plant	normal	seedling	C087
C145.Cold.24H	GSE71680	whole plant	cold	seedling	C145
C145.Cold.6H	GSE71680	whole plant	cold	seedling	C145
C145.N	GSE71680	whole plant	normal	seedling	C145
C147.Cold.24H	GSE71680	whole plant	cold	seedling	C147
C147.Cold.6H	GSE71680	whole plant	cold	seedling	C147
C147.N	GSE71680	whole plant	normal	seedling	C147
C148.Cold.24H	GSE71680	whole plant	cold	seedling	C148
C148.Cold.6H	GSE71680	whole plant	cold	seedling	C148
C148.N	GSE71680	whole plant	normal	seedling	C148
C153.Cold.24H	GSE71680	whole plant	cold	seedling	C153
C153.Cold.6H	GSE71680	whole plant	cold	seedling	C153
C153.N	GSE71680	whole plant	normal	seedling	C153
Dular_root_sample_grown_in_Phosphorus_deficient_conditions	GSE74795	root	nutrient	seedling	Dular
Dular_root_sample_grown_in_Phosphorus_sufficient_conditions	GSE74795	root	normal	seedling	Dular
Dular_shoot_sample_grown_in_Phosphorus_deficient_conditions	GSE74795	shoot	nutrient	seedling	Dular
Dular_shoot_sample_grown_in_Phosphorus_sufficient_conditions	GSE74795	shoot	normal	seedling	Dular
PB1_root_sample_grown_in_Phosphorus_deficient_conditions	GSE74795	root	nutrient	seedling	PB1
PB1_root_sample_grown_in_Phosphorus_sufficient_conditions	GSE74795	root	normal	seedling	PB1
PB1_shoot_sample_grown_in_Phosphorus_deficient_conditions	GSE74795	shoot	nutrient	seedling	PB1
PB1_shoot_sample_grown_in_Phosphorus_sufficient_conditions	GSE74795	shoot	normal	seedling	PB1
